# Supplementary material for: Notch stimulates growth by direct regulation of genes involved in the control of glycolysis and the tricarboxylic acid cycle
Source: PubMed Central journal article supplement (PMC4772804; doi:10.1098/rsob.150155), 2016-02-17

## Supplementary Material

### Supplementary Figure 1:

***CG13334* has predicted Su(H) sites and responds to Notch in luciferase assay.**

- A. Genomic region of *CG13334* showing Su(H) ChIP peaks. Legend as in Fig.1A, black peaks are from *DmD8* cells.
- B. Luciferase assay in *S2* cells using genomic regions indicated in panel A. P-values according to Krustall-Wallis test comparing groups against NME.
- C. Comparison of Notch mRNA levels in uninduced *S2N* cells (no Cu), induced *S2N* cells (Cu) and *DmD8* cells.

### Supplementary Figure 2:

**The expression pattern of hairy**

- A. The expression pattern in wild type control Oregon R wing discs using anti *hairy* antibody (Abcam 20165)
- B. The expression pattern of *hairy-FlyFos* construct tagged with GFP stained with GFP antibody.
- C. The expression pattern of *Hairy-Gal4* (BL30876 *y<sup>1</sup> w<sup>\*</sup>*; PBac{h-EGFP.S}VK00037 x UAS-GFP) using GFP antibody.

*Hairy* is expressed in the pouch as well as in the notum of the wing disc. While the relative intensities of the two bands in the pouch (arrows) differ depending on the reporter used (possibly due to a different timing and perdurance of the constructs ) the overall expression pattern is preserved, although not fully recapitulated.

### Supplementary Figure 3:

**Additional data related to Hairless.**

- A. *S2N* cells were treated with dsRNA against *Hairless* and the expression of mRNA for metabolic genes were quantified relative to their expression in control cells treated with dsRNA against GFP (mock treated, first column). Normalized to the housekeeping gene *CG11306*.

B. Time (hours) of pupation of  $H^2/+$  and wildtype control ( $yw$ ) flies. Thirty L1 staged larvae of indicated genotype were placed per one vial on nutrient rich (++) or nutrient poor (--) diets and pupated adults were counted at indicated time points after egg laying (AEL). 90 larvae were counted per genotype.

**Supplementary Figure 4:**

**The comparison between mRNA quantification data using rp49 or CG11306 as normalizing genes**

- A.** Single experiment from cycloheximide treatment of S2N cells as in Fig.2B, normalized to rp49. Control cells in black, cycloheximide treated cell in green. Normalization to rp49 gives very similar trends as normalization to CG11306.
- B.** Single experiment from Fig.4D. Normalization to rp49 or CG11306 gives nearly identical results.

**Files that will be part of electronic supplementary material (ESM):**

**ESM1: Sequences of enhancers tested in luciferase assay**

Sites for cloning into pGL3 with minimal promoter are in brackets, mutated Su(H) binding sites are marked in red, followed by their mutated versions.

*Glut1 (Kpn1, Bgl2)*

gaagacgacgacatgactgcctttattgctcctacgcctctgccttagccccctccgttccatt**ttccac**gccctt  
ccctttgttcagctgtcgtggccgttgaacaaatgaacaacataaataattgcagaggcacacacactgacac  
acacacacacacgcgttctgaggaaactcgcacgcaactgacaaagagtgaggaaaatcgcaggactcccaa  
ggaacgtttgcagccttgaattgagattaatgagcagcaaaagtgattcaagtcagcatcctcg  
**ttccac** → **TAACAAC**

*Hex-A (1) (Kpn1, Bgl2)*

tgtgctacaagcgaagcagacatcgcaagtataacagttgaaggtgacactggagaccctggcgataggac  
acgtataacagttctgtaatcccaacattggctgacgaaat**atgggaa**tgaaggcgtggttgggagggttaa  
gccact**ttctcca**aaaagtataaaaaccatctggaaccagttgatttttgtatttatctggttctgttgacatgg  
tgattttactcaaagaaccgtttatgaaattcgaaacctacaatgtaaatggaaattccctgagtcaattttcc  
aatatgcaactcctttgga  
**atgggaa** → **ATTGTTA**  
**ttctccc** → **TAATACC**

*Hex-A (2) (Kpn1, Bgl2)*

cagcaccgaatggaaattgcacatgaaatctagctgcaaaaatatgaacaacaaaattccattgaatggaga  
gccagaaagagcgaagtagaggggaagagagtgagagaaggaggagcggaaactcaaacctgggaggcac  
gtacacacacaaaagagggcagggcggggagacgagccccacggacactgaacaaaaatacatacaaatgc  
aaagatatatgtatttgaggatgttgacgcgtcgtagaacttgagaattccaagaagcggtaaaaaacgggtga  
gacgatgatgtaggggagttggggaggggaaggtagctgtcaacagctacgcaacttgctctcccattttc  
tgggtaaacttgctctttctcatctaaaacggcattgttatacaccgatgccgaggagagcgagatcgc  
tgaga**gtgggaa**agcgggtggtggggcccgccgaacagggggttcaaagaacgaagccaa  
**gtgggaa** → **GTTGTTA**

*Hex-A (3) (Kpn1, Bgl2)*

gcgacgcataagggttccgcataaacacgcggttgactcattctcattcatagccactctctgccccctctca  
cgcgcacctatcaatatgccatttgggaccctcagcgtcgacatatacacgccatatctccaacctgccg

*ImpL3 (Kpn1, Bgl2)*

Tcagtttcgttggggagagctaaactcaagaccaactgaagttcacttcagtttcagctcccagcagcagca  
gcagcagcaactttcgagatatacgagcatttgcacataaaaactgcaacgccttcccattgtcagctcgccac  
gaagacttggctgctgtttgcttttggccataaaatataatggccccgatcgaaaaagctgagtggtt  
gaaatttaagtttaatttaagcgatatgaaaaaaaaagggaagacggcaaacggcggtctgcagctgcga  
atcgtgcacgaaatgaagccatttcatattatgaatttgccttatcgaaaaacgttcaattggccatcgac  
ttggggccggcaattaaatggggcagtcataaacgatactgacaggtcggtgggatctgtgggaaagggg  
caagattccggggaactggagatccagaatccagagcgtaacatcctcgcgacttagctgagttattaaggc  
atctttatagccaatctcaatgaggtgtgaagtgaatcgttggccttttattaatacgcgaaaatatattta  
ttgttggctcgtctgcgatcgactcgatattaagc

gtgggaa → GTAGAAA

*hairy (Mlu1, Bgl2)*

agcaacaacaccaacaccaccgacatcaccaacagcacagccagaaacacagcctcttgaatccctca  
gttagcagagcccagcagagtcaagccaaaccgatcgtgatcgaccgaccgaccgacgatccaatgggg  
gtttcgcagtgtgatttcaaaaaggaagaaatgcccatccccgcgagccacggggcgatgagtaacgcggt  
g

ttccgc → TAACAGC

*CG13334 (1) (Kpn1, Bgl2)*

ctgctcatttctgttgacctattgaaatgcgacagttcacatgtgtttcgggattgctgggatgatcgtgga  
gcacgtgtgttgacatactgaccgagagagtgtacttgagcaagggactccccgtgaatctgcccctgc  
tcaagtgtacgtaatttgcattgtctgatttttcaaattacatgacattttccacactgattagcccgcacat  
gccattctctattttcgatgtgatccgagtgacacctgcaacaggcaaacagccagtgagcctgcatccgat  
gcacatccattgcatccagtgaacgaagtgaacgccatcattttccacagccgaggctctgggttatatt  
taacaaatgatgagagatttgggtgcgctacgttttcttttcggttcgga

*CG13334 (2) (Mlu1, Bgl2)*

ccctggatacacagcattgctcactgattttccatcatcgagcagatgctcctgccttgggcactttctc  
atctcctggctggcctcctgcaatttctgtgaacctgttcaaaaattatgcatcgatgcgcatcagtggaatca

tggatggcaacataataatgggatgctgctgatgagtttgctcataaactgatgaggggtacctggctgtctacct  
agctacctgtacctgtgattcatttcgattgcctagctgctgattctgttcacctgttcgtttgctacactttatgcat  
gcttcggcagttttctaattatgacttatgatctctgggattagacaaaacaatggatcgtggcacgtggtcccaa  
gatgctttcgcttgctgacctttccacgatctgtttgcggttgagcgctcgaggccatgatcaccgcaaat  
ccctgcagacaaaacagccaaagg

ttccac → TAACAAC

*CG13334 (3) (Mlu1, Bgl2)*

tggacgcaaccatcatattcttctgctcctgatccttttccaatacctcgattcggagtctcagcgagcaca  
tgccaaagcgaaaaaaggacagggaaacaattaacaactaatttaggcctctgcatataatttatggaga  
gtggtgcggagagtcgcagtcacagggagatgcctatctgcaggagctgtgggaaaaatacgttacattc  
ctttccttgctttccttctctctgctgtcgttgccgcatatttcccacgcatcctcgactctcgtttttgttgg  
tttcggggttcgctttcgtggagta

## **ESM2: Primers for in situ hybridizations**

Impl3 sense probe

T7 Impl3 s GAATTAATACGACTCACTATAGGGAGA

GTGTGCCTCATCGATGTCTG

Impl3 probe a CCCAGGAGGTGTATCCCTTT

Impl3 antisense probe

T7 Impl3 a GAATTAATACGACTCACTATAGGGAGA

CCCAGGAGGTGTATCCCTTT

Impl3 probe s GTGTGCCTCATCGATGTCTG

Hex-A sense probe

T7 Hex-A IS s TAATACGACTCACTATAGGG TGTGTACAAGGAGCGTTTGC

Hex-A IS a GGCTCGTCAGCTTCAATT

Hex-A antisense probe

T7 Hex-A IS a TAATACGACTCACTATAGGG GGCTCGTCAGCTTCAATT

Hex-A IS s TGTGTACAAGGAGCGTTTGC

Glut1 sense probe

T7 Glut1 IS s TAATACGACTCACTATAGGG GGAGATAGCGCCACTGAA

Glut1 IS a ATTAGCGGAATGGACACGAG

Glut1 antisense probe

T7 Glut1 IS a TAATACGACTCACTATAGGG ATTAGCGGAATGGACACGAG

Glut1 IS s GGAGATAGCGCCACTGAA

hairy sense probe

T7 hairy IS s TAATACGACTCACTATAGGG TGCTACAGCACCTGAGCAAC

hairy IS a ATGTGTGCGAGTTGGATGAG

hairy antisense probe

T7 hairy IS a TAATACGACTCACTATAGGG ATGTGTGCGAGTTGGATGAG

hairy IS s TGCTACAGCACCTGAGCAAC

### **ESM3: Supplementary description of methods**

#### ***In situ* hybridizations**

Sense and antisense digoxigenine labeled RNA probes were produced using specific PCR products with T7 promoter sequences at their 5'ends using DIG RNA labeling mix (Roche). Primer sequences can be found in Supplement 2. Proximal halves of larvae containing brains, imaginal discs and other tissues were dissected in PBS and fixed by 4% formaldehyde for 30 minutes, washed with 50% hybridization solution (HS, 50% Formamide, 5X SSC buffer, 100µg/ml DNA salmon sperm, 50µg/ml Heparine, 0.1% Tween20) in PBT-Tween 0,1% for 5 minutes and stored in -20°C in HS. Samples were then incubated with equal amounts of antisense or sense probe in HS at 60°C overnight, washed with HS and HYBE solutions (50% Formamide, 50% 5X SSC buffer), signal detected by anti-DIG antibody (Roche) and wing discs

dissected and mounted in glycerol.

### **Metabolite measurement by NMR**

Cells were seeded in Schneider media and Notch induced by 600 nM CuSO<sub>4</sub> overnight. In the morning cells were washed twice with PBS and collected into cold methanol (-20°C). The samples were then spun (14,000g/5min) – both supernatant and pellet were collected. The pellets were used to establish the protein concentrations using standard Bradford protein assay. The supernatants used for preparation of NMR samples were processed as follows: solvent was removed from the supernatants by controlled evaporation under lowered pressure and room temperature. Dry pellet was resuspended in 550 µl of D<sub>2</sub>O (Sigma-Aldrich) containing 0.005% sodium 3-(trimethylsilyl)propionate-2,2,3,3-d<sub>4</sub> (TSP) (Sigma-Aldrich) for chemical shift reference. The samples were directly employed for acquisition of 1D <sup>1</sup>H NMR spectra. The spectra were acquired at 700 MHz Bruker Avance spectrometer using standard (Bruker) pulse sequence employing presaturation for suppression of residual water signal. All spectra were acquired at 25 °C, processed using TopSpin 3.2 (Bruker, USA) and referenced with respect to TSP. Identities of peaks of selected metabolites were assigned by comparison to reference values for chemical shifts (Biological Magnetic Resonance Bank; Ulrich et al. *Nucl. Acids Res.* 2008) and confirmed by titration of the samples with pure compounds (Sigma-Aldrich). Signals corresponding to the glucose, fumarate, and lactate were manually integrated using built-in routines of TopSpin 3.2 software. The signal volumes were normalized to concentration of the TSP employed here as an internal standard. The signals intensities were further normalized to total protein concentration (*vide supra*).

# Supplementary Figure 1

CG13334

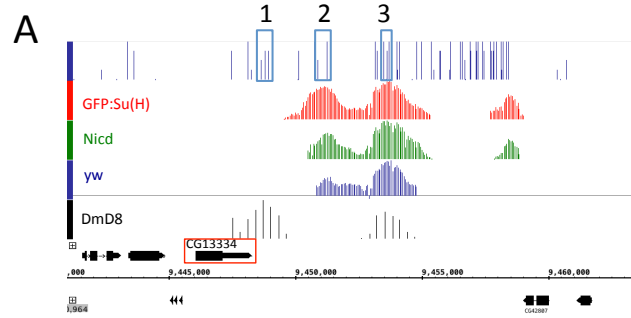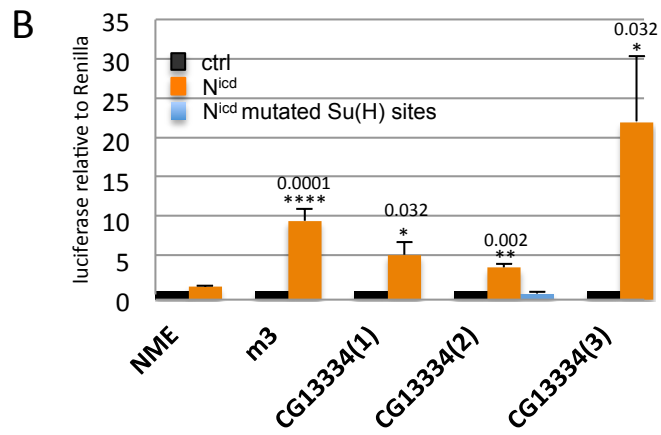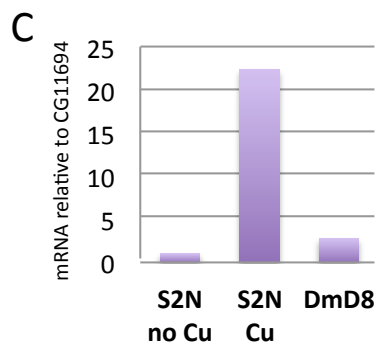



Supplementary Figure 2

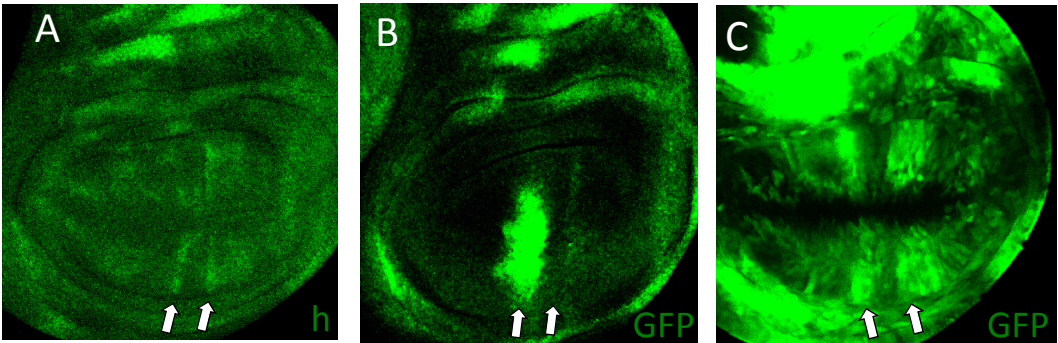

# Supplementary Figure 3

A

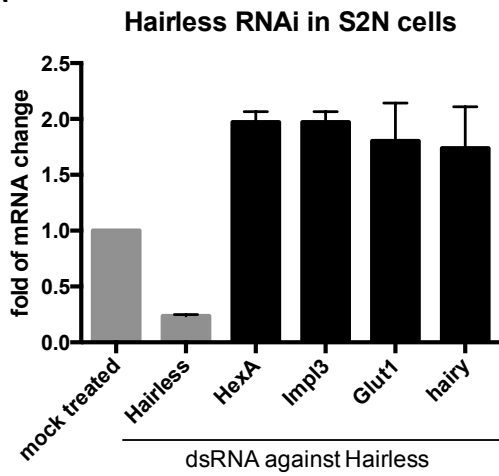

B

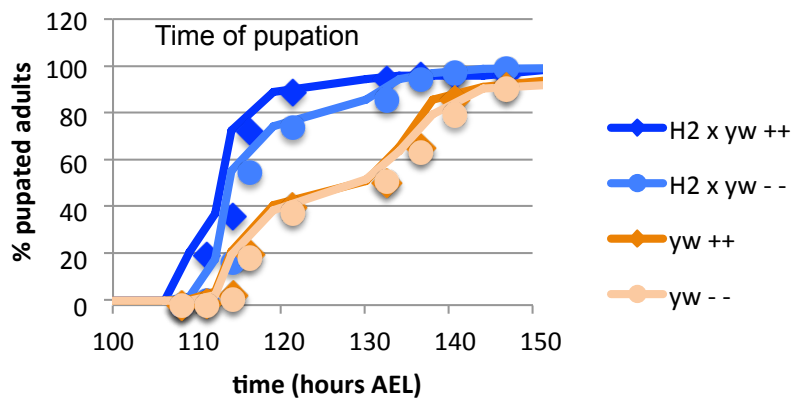

# Supplementary Figure 4

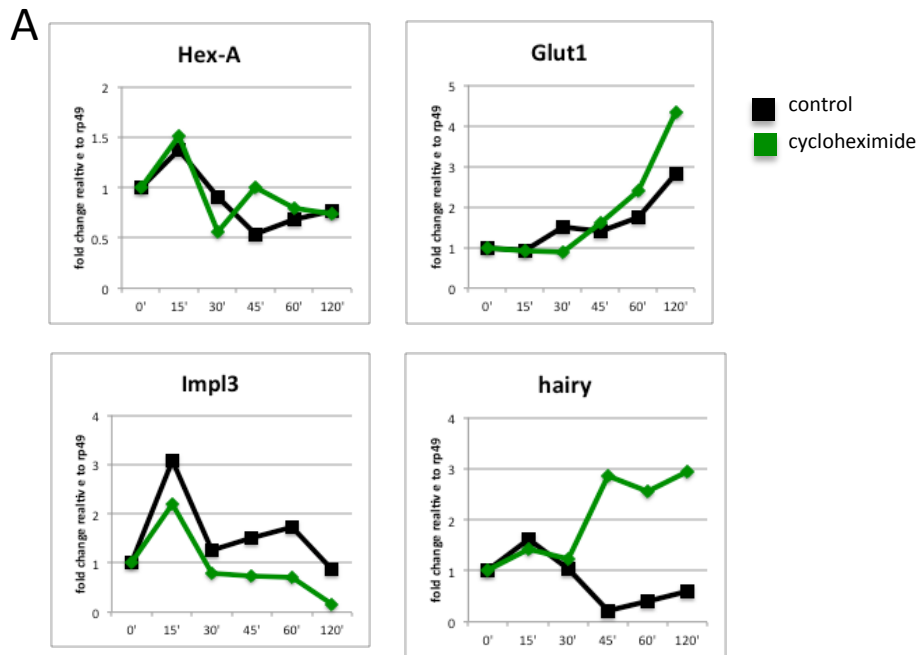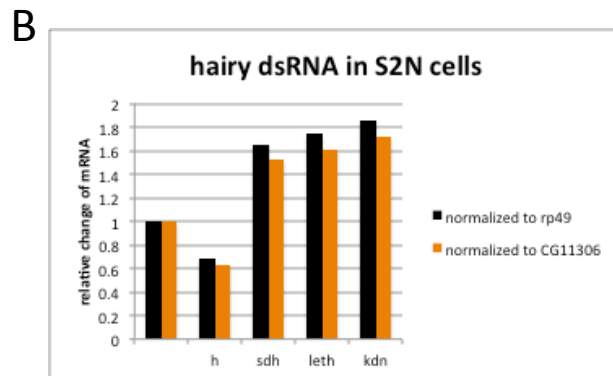

Supplement: rsob150155supp1.pdf [file rsob150155supp1.pdf]
